# Supplementary material for: Time on previous renal replacement therapy is associated with worse outcomes of COVID-19 in a regional cohort of kidney transplant and dialysis patients
Source: PubMed Central journal article supplement — Medicine (Baltimore). 2021 Mar 12;100(10):e24893. doi: 10.1097/MD.0000000000024893 (PMC7969209; doi:10.1097/md.0000000000024893), 2021-03-12
Supplement: medi-100-e24893-s001.pdf [file medi-100-e24893-s001.pdf]

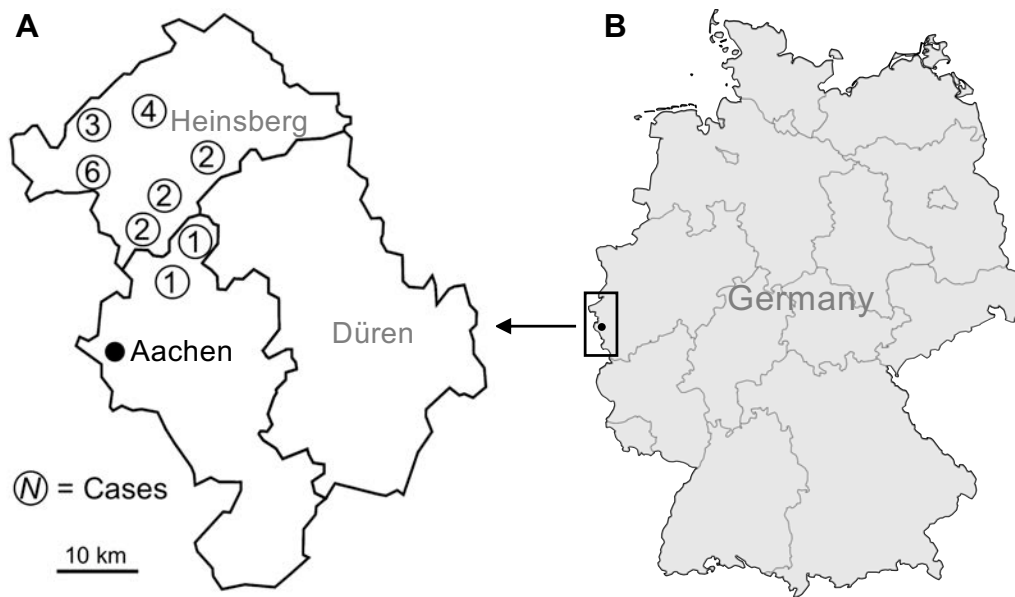

**SUPPLEMENTARY FIGURE 1:**

**Outbreak map**

(A) Map depicting the region of the outbreak with the county of Heinsberg as the epicenter and the adjacent counties of Düren and Aachen, respectively. Black dot: city of Aachen, where RWTH University Hospital is located. Circled numbers: localization and number of cases by town of patients' residence.

(B) Map of Germany. Box and dot: localization of the region of the outbreak and city of Aachen, respectively.
