# Supplementary material for: Time on previous renal replacement therapy is associated with worse outcomes of COVID-19 in a regional cohort of kidney transplant and dialysis patients
Source: PubMed Central journal article supplement — Medicine (Baltimore). 2021 Mar 12;100(10):e24893. doi: 10.1097/MD.0000000000024893 (PMC7969209; doi:10.1097/md.0000000000024893), 2021-03-12
Supplement: medi-100-e24893-s002.pdf [file medi-100-e24893-s002.pdf]

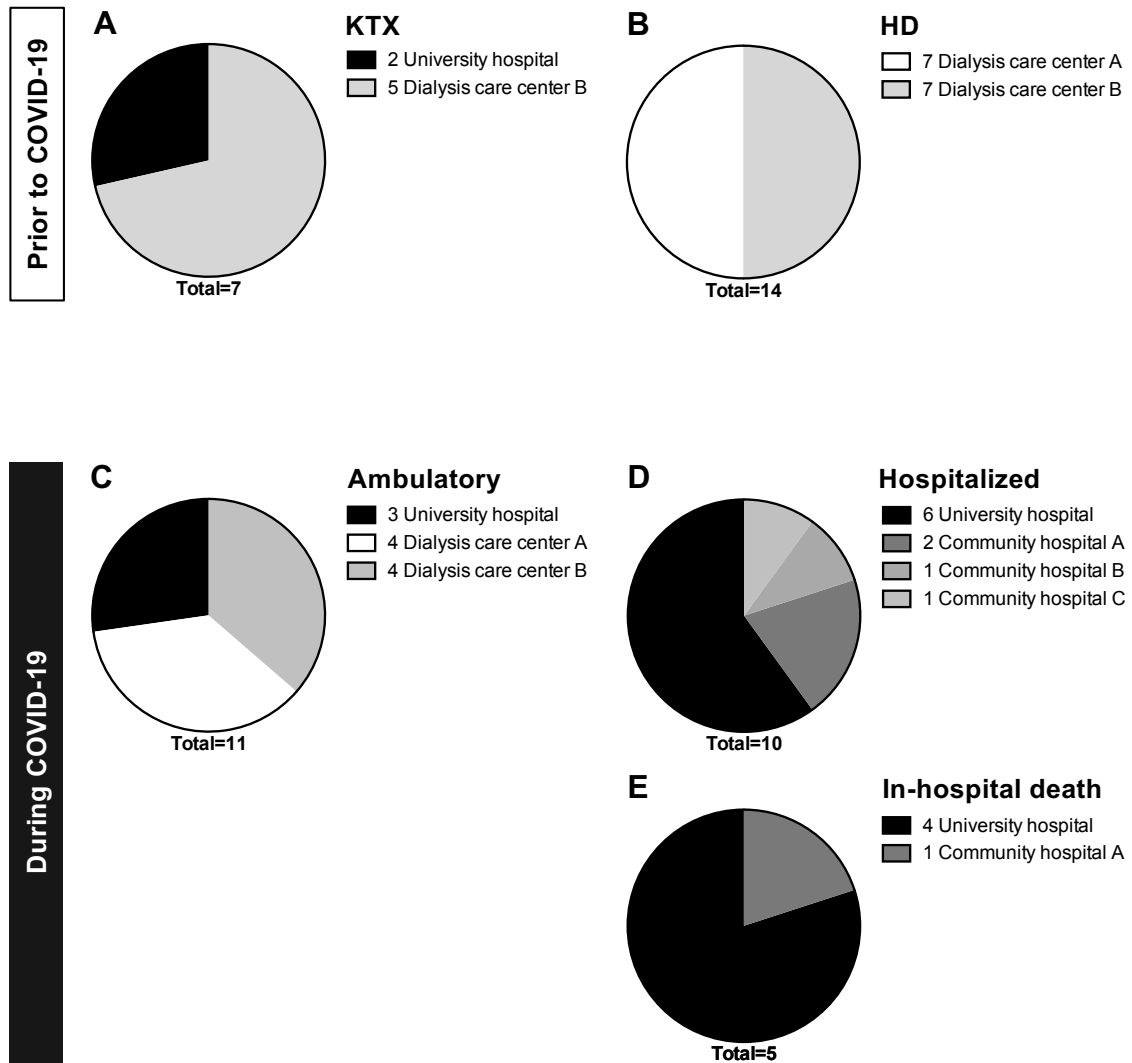

**SUPPLEMENTARY FIGURE 2:**

**Patient to care provider allocation prior to (A-B) and during (C-E) COVID-19/SARS-CoV-2**

Arabic numbers indicate N of patients.

(A) For day-to-day management, the cohort's kidney transplant recipients (KTX) were followed by either RWTH Aachen University Hospital or the local Dialysis care provider B.

(B) For chronic dialysis, the cohort's hemodialysis patients (HD) were equally distributed between the local Dialysis care providers A and B.

(C) During COVID-19/SARS-CoV-2 positivity, ambulatory patients were treated in approximately equal numbers by RWTH Aachen University Hospital and the two local Dialysis care providers.

(D) Patients requiring hospitalization were treated by the University hospital in the majority of cases, while otherwise distributed among three local Community hospitals.

(E) Out of the five total deaths that were noted, four occurred at the University hospital. The death in the Community hospital was due to fulminant multi-organ failure directly following the need for intubation. Taken together, this indicates that access to tertiary care was not restricted but available when needed.
