# Supplementary material for: Time on previous renal replacement therapy is associated with worse outcomes of COVID-19 in a regional cohort of kidney transplant and dialysis patients
Source: PubMed Central journal article supplement — Medicine (Baltimore). 2021 Mar 12;100(10):e24893. doi: 10.1097/MD.0000000000024893 (PMC7969209; doi:10.1097/md.0000000000024893), 2021-03-12
Supplement: medi-100-e24893-s003.pdf [file medi-100-e24893-s003.pdf]

**SUPPLEMENTARY TABLE 2** Individual patient baseline diagnoses, remaining risk factors and COVID-19-associated diagnoses

| Case #                                                                     | Age, y; sex<br>(†, deceased)<br>(A, ARDS) | Baseline diagnoses                                                                    | BMI  | ABO<br>type | DM | HTN | RAAS<br>block | CCI | HFRS | COVID-19-associated diagnoses (on illness days)                                                                                                                                                                                                                                 |
|----------------------------------------------------------------------------|-------------------------------------------|---------------------------------------------------------------------------------------|------|-------------|----|-----|---------------|-----|------|---------------------------------------------------------------------------------------------------------------------------------------------------------------------------------------------------------------------------------------------------------------------------------|
| <b>Kidney transplant with COVID-19 (KTX-COVID)</b>                         |                                           |                                                                                       |      |             |    |     |               |     |      |                                                                                                                                                                                                                                                                                 |
| 1                                                                          | 52; m                                     | KTX CKD2, TAC-induced DM, factor V Leiden het mut                                     | 29.4 | A           | T2 | X   | ACEi          | 4   | 2.4  | none                                                                                                                                                                                                                                                                            |
| 2                                                                          | 55; m                                     | KTX CKD2                                                                              | 23.5 | A           |    | X   | ACEi          | 3   | 10.4 | none                                                                                                                                                                                                                                                                            |
| 3                                                                          | 64; f                                     | KTX CKD3b, asthma, s/p hepatitis B, osteoporosis, HPT, RLLS, CPS                      | 24.5 | A           | T2 |     |               | 7   | 19.9 | none                                                                                                                                                                                                                                                                            |
| 4                                                                          | 68; m (A)                                 | KTX CKD4-5, ADPKD, AFIB, CHF, dementia, stroke, UTIs                                  | 23.5 | A           | T2 | X   |               | 8   | 39.3 | ARDS <300 mmHg §, 6LO2/min and RR>20 (20)                                                                                                                                                                                                                                       |
| 5                                                                          | 62; f (†) (A)                             | KTX CKD4-5, CADx3, chronic TX rejection, ICB, RLLS                                    | 23.8 | A           |    | X   | ARB           | 6   | 22.4 | ARDS < 200 mmHg § (12), AKI3 (12), EBV react (18), CoV-2 myocarditis / AFIB (22), coronary artery dissection (26), pancreatitis (27), 16x PRBC (14-45, 60), intracerebral microhemorrhage, seizures (37), necrotizing encephalitis (57), thoracic bleed. Cause of death: sepsis |
| 6                                                                          | 62; f (†) (A)                             | KTX CKD4, AA amy, COLD, Crohn's, HC, PT mutation, caval vein thrombosis, osteoporosis | 23.7 | A           |    | X   | ARB           | 5   | 4.6  | ARDS <100 mmHg § (14), sodium 116 mmol/L (1), VAP S. pneumoniae (14), vasopressors (14). Cause of death: septic shock while on ECMO                                                                                                                                             |
| 7                                                                          | 69; m (†) (A)                             | KTX CKD2-3a, AFIB, CAD, CHF, OSAS, stroke                                             | 23.1 | B           | T2 | X   |               | 8   | 13   | ARDS < 100 mmHg § (10), rhabdomyolysis (10), MOV: AKI3, vasopressors (16). Cause of death: septic shock and hypercapnic respiratory failure                                                                                                                                     |
| <b>Hemodialysis with COVID-19 (HD-COVID)</b>                               |                                           |                                                                                       |      |             |    |     |               |     |      |                                                                                                                                                                                                                                                                                 |
| 1                                                                          | 65; m                                     | ADPKD, AFIB, CADx2, valvular CHF, OSAS, PNP, diverticulitis                           | 35.4 | A           |    | X   | ARB           | 6   | 1.4  | none                                                                                                                                                                                                                                                                            |
| 2                                                                          | 79; f                                     | AFIB, DN, HPT, hypothyroidism, PNP                                                    | 21.1 | O           | T2 |     |               | 7   | 2.4  | inappetence                                                                                                                                                                                                                                                                     |
| 3                                                                          | 61; f                                     | ADPKD, CADx1, CHF, COLD, emphysema, goiter, smoking, stroke                           | 29.6 | O           |    | X   | ARB           | 8   | 4.1  | none                                                                                                                                                                                                                                                                            |
| 4                                                                          | 69; m                                     | CAD, secondary epilepsy, stroke, chronic pain                                         | 28.4 | A           |    | X   |               | 6   | 16   | none                                                                                                                                                                                                                                                                            |
| 5                                                                          | 73; m                                     | AFIB, CADx3, CHF, DN, stroke                                                          | 22.1 | A           | T2 | X   | ACEi          | 10  | 3.3  | none                                                                                                                                                                                                                                                                            |
| 6                                                                          | 79; f                                     | CADx3, biologic aortic valve replacement, HC                                          | 26.7 | O           |    | X   | ARB           | 6   | 2.6  | none                                                                                                                                                                                                                                                                            |
| 7                                                                          | 38; f                                     | CADx3, DN, hypothyroidism, PNP                                                        | 42.2 | O           | T1 | X   |               | 5   | 3.5  | CoV-2 pneumonia, not fulfilling ARDS criteria                                                                                                                                                                                                                                   |
| 8                                                                          | 73; m                                     | CADx1, CyA-toxicity, myasthenia gravis                                                | 26.5 | B           |    | X   |               | 6   | 6.9  | CoV-2 pneumonia, not fulfilling ARDS criteria                                                                                                                                                                                                                                   |
| 9                                                                          | 66; f (A)                                 | Aortic stenosis, asthma, hypothyroid disease, s/p PE and DVT, RA                      | 45.3 | O           |    |     |               | 6   | 4.7  | ARDS <200 mmHg § (4), myocarditis, 8x PRBC transfusion (6-16), HSV-1 (14-25)                                                                                                                                                                                                    |
| 10                                                                         | 72; m (†) (A)                             | AFIB, CADx1, valvular CHF, OSAS, renal cell carcinoma, stroke                         | 36.2 | A           | T2 | X   | ACEi          | 10  | 1.4  | ARDS <200 mmHg §, suspected bacterial pulmonary superinfection. Cause of death: MOV                                                                                                                                                                                             |
| 11                                                                         | 67; f (†) (A)                             | CADx1, COLD, cured ovarian and pulmonary carcinomas, Ormond's disease, PAD2-3, stroke | 26.8 | A           |    | X   | ARB           | 8   | 8.5  | ARDS <100 mmHg § (9), AFIB (11), inv-pulm aspergillosis (13-20), EBV+HSV-1 react (13, 20) pancrea-titis (13), 14x PRBC (10-35), vasopressors (11-35), myocarditis, Cause of death: intestinal ischemia (34)                                                                     |
| <b>Hemodialysis asymptomatic SARS CoV-2 RNA positive (HD-asympt CoV-2)</b> |                                           |                                                                                       |      |             |    |     |               |     |      |                                                                                                                                                                                                                                                                                 |
| 1                                                                          | 65; f                                     | valvular CHF, DVT, RA                                                                 | 28.1 | A           | T2 | X   | ARB           | 7   | 10   | none                                                                                                                                                                                                                                                                            |
| 2                                                                          | 79; m                                     | abdomonal aortic aneurysm, valvular CHF, PFO, stroke                                  | 30.2 | A           |    | X   | ACEi          | 7   | 2.4  | none                                                                                                                                                                                                                                                                            |
| 3                                                                          | 87; f                                     | CAD, valvular CHF, COLD                                                               | 28.4 | n/a         | T2 | X   | ARB           | 10  | 3.8  | none                                                                                                                                                                                                                                                                            |

A, ARDS, acute respiratory distress syndrome; AA amy, AA amyloidosis; ACEi, angiotensin-converting enzyme-inhibitor; ADPKD, autosomal dominant polycystic kidney disease; AFIB, atrial fibrillation; AKI, acute kidney injury according to KDIGO; ARB, angiotensin receptor blocker; AS, aortic stenosis; BMI, body mass index in kg/m<sup>2</sup>; CAD, coronary artery disease including number of involved coronaries; CCI, Charlson comorbidity index; CHF, congestive heart failure; CKD, chronic kidney disease according to KDIGO; COLD, chronic obstructive lung disease; CPS, chronic pain syndrome; CyA, ciclosporin A; d, day; DN, diabetic nephropathy; DVT, deep vein thrombosis; EBV, Epstein Barr virus; ECMO, extra corporeal membrane oxygenation; f, female; het mut, heterozygous mutation; HPT, hyperparathyroidism; HC, hypercholesterinemia; HSV-1, herpes-simplex virus; HTN, arterial hypertension; Inv-pulm, invasive pulmonary; m, male; KTX, kidney transplant; L, liter; min, minute; O<sub>2</sub>, oxygenflow in L/min; OSAS, obstructive sleep apnea syndrome; PAD, peripheral artery disease including stage 1-4 according to Fontaine; PE, pulmonary embolism; PF, patent foramen ovale; PNP, polyneuropathy; PRBC, packed red blood cells; pred, prednisolone, PT, prothrombin; RA, rheumatoid arthritis; RAAS block, renin-angiotensin-aldosterone system blockade; react, reactivation; RLLS, restless legs syndrome; RRT, renal replacement therapy; S. pneumoniae, Streptococcus pneumoniae; s/p, status post; T1, type 1; T2, type 2; TAC, tacrolimus; UTI, urinary tract infection; VAP, ventilator-associated pneumonia; y, years; † deceased; § mmHg oxygenation index according to Horowitz, i.e. the patient's arterial partial oxygen pressure (paO<sub>2</sub>) divided by the applied oxygen concentration in Timepoints are expressed as days from beginning of the illness/SARS CoV-2 positivity, whichever first
