# Supplementary material for: Time on previous renal replacement therapy is associated with worse outcomes of COVID-19 in a regional cohort of kidney transplant and dialysis patients
Source: PubMed Central journal article supplement — Medicine (Baltimore). 2021 Mar 12;100(10):e24893. doi: 10.1097/MD.0000000000024893 (PMC7969209; doi:10.1097/md.0000000000024893), 2021-03-12
Supplement: medi-100-e24893-s005.pdf [file medi-100-e24893-s005.pdf]

**SUPPLEMENTARY TABLE 3** Individual patient laboratory and radiology investigations

| Case #                                                                     | Age, y; sex (†, deceased) (A, ARDS) | Leu [G/L] (4.0-10.0) | Lymph [G/L] (1.0-1.9)   | Platelets [G/L] (150-400) | Hb [g/dL] (11.2-15.7) | LDH [U/L] (<250)     | D-Dim [ng/mL] (<500)   | CRP [mg/L] (<5)    | PCT [ng/mL] (<0.5)      | GFR: baseline; worst; post | Urine         | Imaging (time point, day) | Imaging findings, type (distribution)                                                        | CoV-RADS; grade § |
|----------------------------------------------------------------------------|-------------------------------------|----------------------|-------------------------|---------------------------|-----------------------|----------------------|------------------------|--------------------|-------------------------|----------------------------|---------------|---------------------------|----------------------------------------------------------------------------------------------|-------------------|
| <b>Kidney transplant with COVID-19 (KTX-COVID)</b>                         |                                     |                      |                         |                           |                       |                      |                        |                    |                         |                            |               |                           |                                                                                              |                   |
| 1                                                                          | 52; m                               | -                    | -                       | -                         | -                     | -                    | -                      | -                  | -                       | 68; n/a; 68                | \$            | -                         | -                                                                                            | -                 |
| 2                                                                          | 55; m                               | <b>11.0</b>          | -                       | 287.0                     | 13.9                  | 225                  | -                      | 1.3                | -                       | 65; 65; 65                 | P0, E0        | -                         | -                                                                                            | -                 |
| 3                                                                          | 64; f                               | 8.5                  | 2.35                    | 200                       | 12.6                  | 224                  | -                      | 0.4                | -                       | 40; 40; 40                 | P0, E0        | -                         | -                                                                                            | -                 |
| 4                                                                          | 68; m (A)                           | <b>12.6</b>          | <b>0.44</b>             | 173                       | 12.7                  | <b>313</b>           | 476                    | <b>68</b>          | 0.18                    | 20; 7; 20                  | P0, E1        | XR (1)                    | airspace opacification (periph, basal, bilat)                                                | -                 |
| 5                                                                          | 62; f (†) (A)                       | 7.9                  | <b>0.33</b>             | <b>142</b>                | 11.5                  | <b>413</b>           | <b>1236</b>            | <b>48</b>          | 0.34                    | 15; 7 →RRT                 | \$            | CT (8)                    | focal ground glass opacities (periph, bilat)                                                 | 4; 2              |
| 6                                                                          | 62; f (†) (A)                       | 9.4                  | <b>0.15</b>             | 282                       | <b>10.2</b>           | <b>258</b>           | <b>1711</b>            | <b>112</b>         | 0.30                    | 24; 21 →RRT                | <b>P1, E1</b> | CT (2)                    | focal ground glass opacities and consolidations, crazy paving (periph, basal, bilat)         | 5; 3              |
| 7                                                                          | 69; m (†) (A)                       | 3.4                  | <b>0.24</b>             | 223                       | <b>10.9</b>           | <b>602</b>           | <b>1347</b>            | <b>90</b>          | <b>2.11</b>             | 60; 19 →RRT                | <b>P1, E3</b> | CT (12) and XR (10)       | diffuse ground glass opacities, focal consolidations, crazy paving (bilat)                   | 4; 4              |
| Median (IQR)                                                               |                                     | 8.9 (6.8-11.4)       | <b>0.33 (0.19-1.40)</b> | 212 (165-283)             | 12.1 (10.7-13.0)      | <b>285 (225-460)</b> | <b>1292 (666-1620)</b> | <b>58 (1.1-95)</b> | 0.32 (0.21-1.67)        | -                          | -             | -                         | -                                                                                            | -                 |
| <b>Hemodialysis with COVID-19 (HD-COVID)</b>                               |                                     |                      |                         |                           |                       |                      |                        |                    |                         |                            |               |                           |                                                                                              |                   |
| 1                                                                          | 65; m                               | 6.9                  | -                       | 358                       | 12.5                  | -                    | -                      | <b>9</b>           | -                       | RRT                        | -             | -                         | -                                                                                            | -                 |
| 2                                                                          | 79; f                               | 4.1                  | <b>0.30</b>             | 163                       | 12.4                  | <b>256</b>           | <b>3460</b>            | <b>77</b>          | <b>1.39</b>             | RRT                        | -             | -                         | -                                                                                            | -                 |
| 3                                                                          | 61; f                               | <b>2.0</b>           | <b>0.20</b>             | <b>128</b>                | <b>10.8</b>           | <b>264</b>           | <b>220</b>             | <b>20</b>          | 0.31                    | RRT                        | -             | -                         | -                                                                                            | -                 |
| 4                                                                          | 69; m                               | <b>3.6</b>           | 1.30                    | <b>142</b>                | 11.6                  | 141                  | <b>15800</b>           | <b>9</b>           | <b>1.05</b>             | RRT                        | -             | -                         | -                                                                                            | -                 |
| 5                                                                          | 73; m                               | 4.3                  | <b>0.50</b>             | 166                       | 11.5                  | 153                  | <b>390</b>             | 5                  | 0.20                    | RRT                        | -             | -                         | -                                                                                            | -                 |
| 6                                                                          | 79; f                               | <b>3.9</b>           | -                       | 210                       | 12.1                  | -                    | -                      | <b>21</b>          | -                       | RRT                        | -             | -                         | -                                                                                            | -                 |
| 7                                                                          | 38; f                               | 5.1                  | <b>0.91</b>             | 156                       | 13.1                  | <b>368</b>           | <b>5000</b>            | <b>174</b>         | 0.25                    | RRT                        | -             | XR (4)                    | airspace opacification (periph, basal, bilat)                                                | -                 |
| 8                                                                          | 73; m                               | 8.5                  | <b>0.90</b>             | 215                       | 12.5                  | -                    | -                      | -                  | -                       | RRT                        | -             | XR (4)                    | normal                                                                                       | -                 |
| 9                                                                          | 66; f (A)                           | <b>2.8</b>           | <b>0.72</b>             | 213                       | <b>9.6</b>            | <b>444</b>           | <b>1402</b>            | <b>317</b>         | <b>5.90</b>             | RRT                        | P0, E0        | XR (5)                    | airspace opacification (central, periph)                                                     | -                 |
| 10                                                                         | 72; m (†) (A)                       | 4.5                  | <b>0.39</b>             | <b>91</b>                 | 14.7                  | <b>288</b>           | -                      | <b>151</b>         | -                       | RRT                        | -             | XR (1)                    | airspace opacification (periph, basal, bilat)                                                | -                 |
| 11                                                                         | 67; f (†) (A)                       | 7.5                  | <b>0.50</b>             | 186                       | <b>11.0</b>           | <b>394</b>           | <b>1900</b>            | <b>189</b>         | <b>2.83</b>             | RRT                        | P0, E1        | CT (13) and XR (5)        | focal consolidations, ground glass opacities, interlobular septal thickening (bilat, periph) | 3; 3              |
| Median (IQR)                                                               |                                     | 4.3 (3.6-6.9)        | <b>0.50 (0.34-0.91)</b> | 166 (142-213)             | 12.1 (11.0-12.5)      | <b>276 (178-388)</b> | <b>1900 (390-5000)</b> | 49 (9-178)         | <b>1.10 (0.25-2.83)</b> | -                          | -             | -                         | -                                                                                            | -                 |
| <b>Hemodialysis asymptomatic SARS CoV-2 RNA positive (HD-asympt CoV-2)</b> |                                     |                      |                         |                           |                       |                      |                        |                    |                         |                            |               |                           |                                                                                              |                   |
| 1                                                                          | 65; f                               | -                    | -                       | -                         | -                     | -                    | -                      | -                  | -                       | RRT                        | -             | -                         | -                                                                                            | -                 |
| 2                                                                          | 79; m                               | <b>3.7</b>           | -                       | <b>129</b>                | 12.2                  | -                    | -                      | 3                  | -                       | RRT                        | -             | -                         | -                                                                                            | -                 |
| 3                                                                          | 87; f                               | 6.9                  | -                       | 183                       | <b>10.8</b>           | -                    | -                      | 2                  | -                       | RRT                        | -             | -                         | -                                                                                            | -                 |
| Median (IQR)                                                               |                                     | 5.3 (3.7-6.9)        | -                       | 156 (129-183)             | 11.5 (10.8-12.2)      | -                    | -                      | 2.5 (2-3)          | -                       | -                          | -             | -                         | -                                                                                            | -                 |

A, ARDS, acute respiratory distress syndrome; bilat., bilateral; CRP, C-reactive protein; CT, computed tomography; CXR, chest x-ray; D-Dim, D-dimer levels; E, erythrocytes on dipstick graded 0-4; f, female; G, giga; GFR, glomerular filtration rate in ml/min/1.73m<sup>2</sup>; g, gram; Hb, hemoglobin concentration; IQR, interquartile range; L, liter; LDH, lactate dehydrogenase; Leu, leukocytes; Lymph, lymphocytes; m, male; m, milli; n, nano; P, proteinuria on dipstick graded 0-4; PCT, procalcitonin; periph., peripheral; RRT, renal replacement therapy; U, units; y, year; † deceased; \$ pre-existing proteinuria and hematuria

§ Radiologic classification, CT-score: CoV-RADS 1: no pathological findings or non-infectious abnormalities; CoV-RADS 2: pneumonia, findings inconsistent with COVID-19; CoV-RADS 3: atypical pneumonia, COVID-19 possible; CoV-RADS 4: atypical pneumonia, with signs suspicious of COVID-19 involvement; CoV-RADS 5: atypical pneumonia, with typical signs suspicious of COVID-19. Grade: the degree of involvement was graded from 0 to 4 as follows. None=0 (0%), minimal=1 (1 - 25%), mild=2 (26 - 50%), moderate=3 (51 - 75%), or severe=4 (76 - 100%)

Timepoints are expressed as days from beginning of the illness/SARS CoV-2 positivity, whichever first
