# Supplementary material for: Time on previous renal replacement therapy is associated with worse outcomes of COVID-19 in a regional cohort of kidney transplant and dialysis patients
Source: PubMed Central journal article supplement — Medicine (Baltimore). 2021 Mar 12;100(10):e24893. doi: 10.1097/MD.0000000000024893 (PMC7969209; doi:10.1097/md.0000000000024893), 2021-03-12
Supplement: medi-100-e24893-s006.pdf [file medi-100-e24893-s006.pdf]

**SUPPLEMENTARY TABLE 4** Individual patient symptoms at presentation

| Case #                                                                     | Age, y; sex<br>(† deceased)<br>(A, ARDS) | Fever<br>(> 38°C)/<br>chills | Cough | Weakness | Diarrhea | Nausea/<br>vomiting | Dyspnoea | Myalgia | Anosmia | Dys-<br>phagia | Rhinitis | Sore<br>throat |
|----------------------------------------------------------------------------|------------------------------------------|------------------------------|-------|----------|----------|---------------------|----------|---------|---------|----------------|----------|----------------|
| <b>Kidney transplant with COVID-19 (KTX-COVID)</b>                         |                                          |                              |       |          |          |                     |          |         |         |                |          |                |
| 1                                                                          | 52; m                                    | 1                            |       |          |          |                     |          |         |         |                |          |                |
| 2                                                                          | 55; m                                    | 1                            | 1     | 1        |          |                     |          | 1       | 1       |                |          |                |
| 3                                                                          | 64; f                                    |                              | 1     | 1        |          |                     |          |         | 1       | 1              |          |                |
| 4                                                                          | 68; m (A)                                |                              |       |          |          |                     |          |         |         |                |          |                |
| 5                                                                          | 62; f (†) (A)                            | 1                            | 1     |          | 1        | 1                   |          |         |         |                |          |                |
| 6                                                                          | 62; f (†) (A)                            | 1                            | 1     | 1        | 1        | 1                   | 1        |         |         |                |          |                |
| 7                                                                          | 69; m (†) (A)                            | 1                            | 1     | 1        | 1        |                     |          |         |         |                |          |                |
| <b>Hemodialysis with COVID-19 (HD-COVID)</b>                               |                                          |                              |       |          |          |                     |          |         |         |                |          |                |
| 1                                                                          | 65; m                                    | 1                            |       | 1        | 1        |                     |          |         |         |                |          |                |
| 2                                                                          | 79; f                                    | 1                            | 1     |          |          |                     |          | 1       |         |                |          |                |
| 3                                                                          | 61; f                                    | 1                            | 1     |          |          |                     | 1        |         |         |                |          |                |
| 4                                                                          | 69; m                                    |                              |       | 1        |          |                     |          |         |         |                |          |                |
| 5                                                                          | 73; m                                    | 1                            |       |          | 1        | 1                   |          |         |         |                |          |                |
| 6                                                                          | 79; f                                    | 1                            |       | 1        |          | 1                   |          |         |         |                |          |                |
| 7                                                                          | 38; f                                    | 1                            | 1     | 1        |          |                     |          |         |         |                |          |                |
| 8                                                                          | 73; m                                    |                              | 1     | 1        | 1        | 1                   |          |         |         |                |          |                |
| 9                                                                          | 66; f (A)                                | 1                            | 1     |          |          |                     | 1        |         |         |                |          |                |
| 10                                                                         | 72; m (†) (A)                            | 1                            |       | 1        |          |                     | 1        |         |         |                |          |                |
| 11                                                                         | 67; f (†) (A)                            | 1                            | 1     | 1        |          |                     |          |         |         |                |          |                |
| <b>Hemodialysis asymptomatic SARS CoV-2 RNA positive (HD-asympt CoV-2)</b> |                                          |                              |       |          |          |                     |          |         |         |                |          |                |
| 1                                                                          | 65; f                                    |                              |       |          |          |                     |          |         |         |                |          |                |
| 2                                                                          | 79; m                                    |                              |       |          |          |                     |          |         |         |                |          |                |
| 3                                                                          | 87; f                                    |                              |       |          |          |                     |          |         |         |                |          |                |
|                                                                            | Sum, N                                   | 14                           | 11    | 11       | 6        | 5                   | 4        | 2       | 2       | 1              | 0        | 0              |
|                                                                            | % of total of N=21                       | 67                           | 52    | 52       | 29       | 24                  | 19       | 10      | 10      | 5              | 0        | 0              |

A, ARDS, acute respiratory distress syndrome; °C, degree Celsius; f, female; m, male; N, number of patients with symptom/sign; † deceased
