# Supplementary material for: Time on previous renal replacement therapy is associated with worse outcomes of COVID-19 in a regional cohort of kidney transplant and dialysis patients
Source: PubMed Central journal article supplement — Medicine (Baltimore). 2021 Mar 12;100(10):e24893. doi: 10.1097/MD.0000000000024893 (PMC7969209; doi:10.1097/md.0000000000024893), 2021-03-12
Supplement: medi-100-e24893-s007.pdf [file medi-100-e24893-s007.pdf]

**SUPPLEMENTARY TABLE 5** Univariate analysis of admission laboratory values associated with ARDS or death

| Laboratory parameter [unit] (reference value) | Non-ARDS         | N  | ARDS             | N | one-tailed p-value |
|-----------------------------------------------|------------------|----|------------------|---|--------------------|
| Leukocytes [G/L] (4.0-10.0)                   | 4.7 (3.8-8.1)    | 12 | 7.5 (3.4-9.4)    | 7 | 0.233              |
| Lymphocytes [G/L] (1.0-1.9)                   | 0.9 (0.3-0.9)    | 7  | 0.4 (0.2-0.5)    | 7 | 0.055              |
| Platelets [G/L] (150-400)                     | 175 (146-214)    | 12 | 186 (142-223)    | 7 | 0.403              |
| Hemoglobin [g/dL] (11.2-15.7)                 | 12.4 (11.6-12.6) | 13 | 11.0 (10.2-12.7) | 7 | 0.178              |
| Lactate dehydrogenase [U/L] (<250)            | 225 (153-264)    | 7  | 394 (288-444)    | 7 | <b>0.007</b>       |
| D-Dimers [ng/mL] (<500)                       | 3460 (305-10400) | 5  | 1375 (1046-1900) | 6 | 0.137              |
| C-reactive protein [mg/L] (<5)                | 9 (2-21)         | 11 | 112 (68-112)     | 7 | <b>0.009</b>       |
| Procalcitonin [ng/mL] (<0.5)                  | 0.3 (0.2-1.2)    | 5  | 1.2 (0.3-3.6)    | 6 | 0.109              |

ARDS, acute respiratory distress syndrome; G, giga; g, gram; L, liter; m, milli, n, nano; N, number of available patient samples; U, units

Data expressed as median (interquartile range, IQR). Statistical analysis by either standard or Welch's corrected t-test
