# Supplementary material for: Time on previous renal replacement therapy is associated with worse outcomes of COVID-19 in a regional cohort of kidney transplant and dialysis patients
Source: PubMed Central journal article supplement — Medicine (Baltimore). 2021 Mar 12;100(10):e24893. doi: 10.1097/MD.0000000000024893 (PMC7969209; doi:10.1097/md.0000000000024893), 2021-03-12
Supplement: medi-100-e24893-s008.pdf [file medi-100-e24893-s008.pdf]

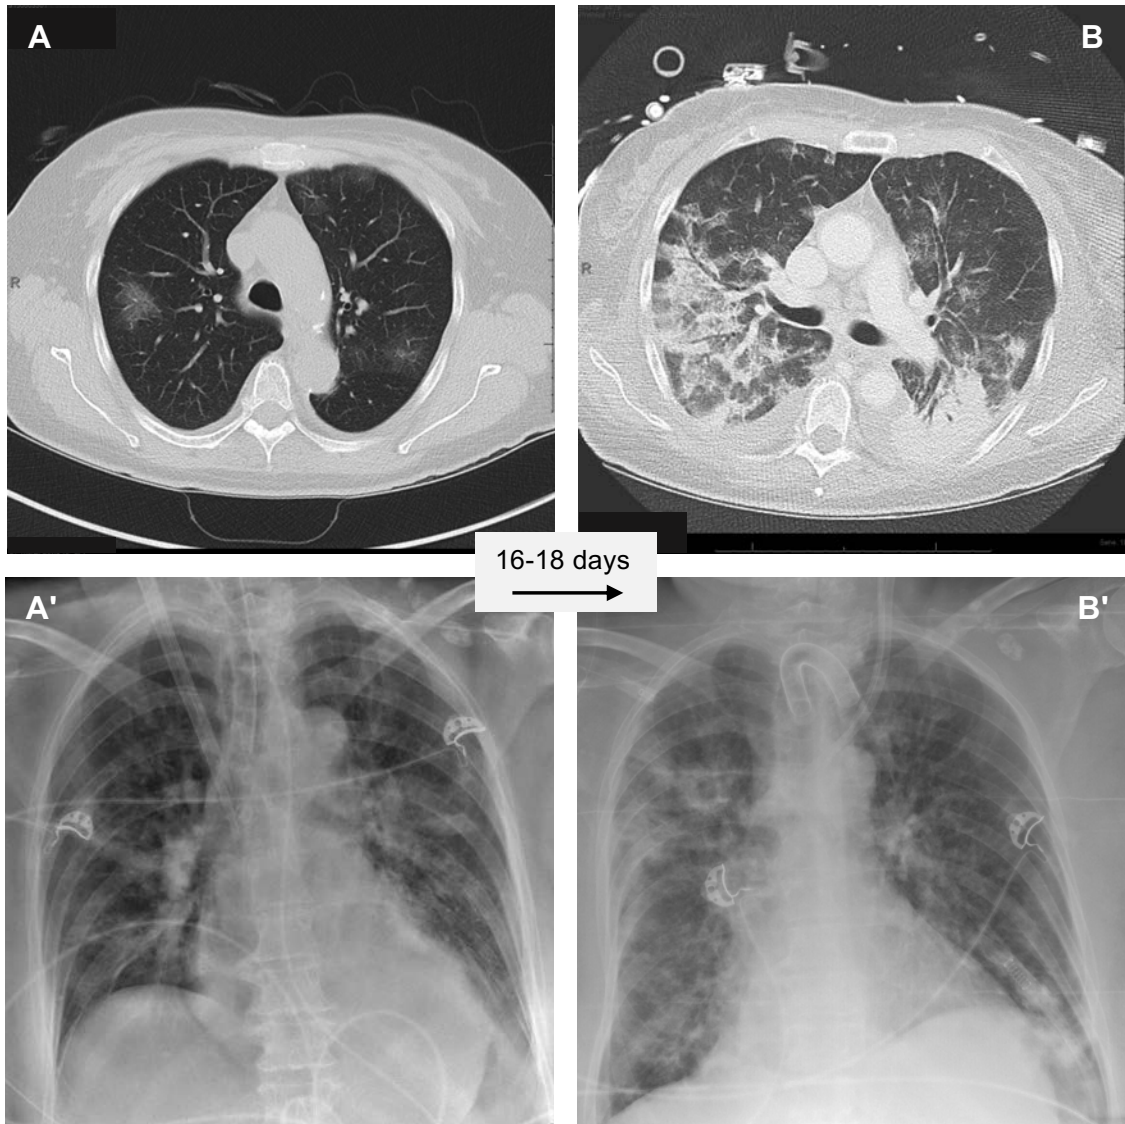

**SUPPLEMENTARY FIGURE 4:**

**Representative COVID-19-specific pulmonary images from patient KTX-COVID #5**

**(A, B)** Computed tomography on disease day 12 and 28, respectively.

**(A', B')** Chest radiography on disease day 7 and 25, respectively.
