# Supplementary material for: Time on previous renal replacement therapy is associated with worse outcomes of COVID-19 in a regional cohort of kidney transplant and dialysis patients
Source: PubMed Central journal article supplement — Medicine (Baltimore). 2021 Mar 12;100(10):e24893. doi: 10.1097/MD.0000000000024893 (PMC7969209; doi:10.1097/md.0000000000024893), 2021-03-12
Supplement: medi-100-e24893-s009.pdf [file medi-100-e24893-s009.pdf]

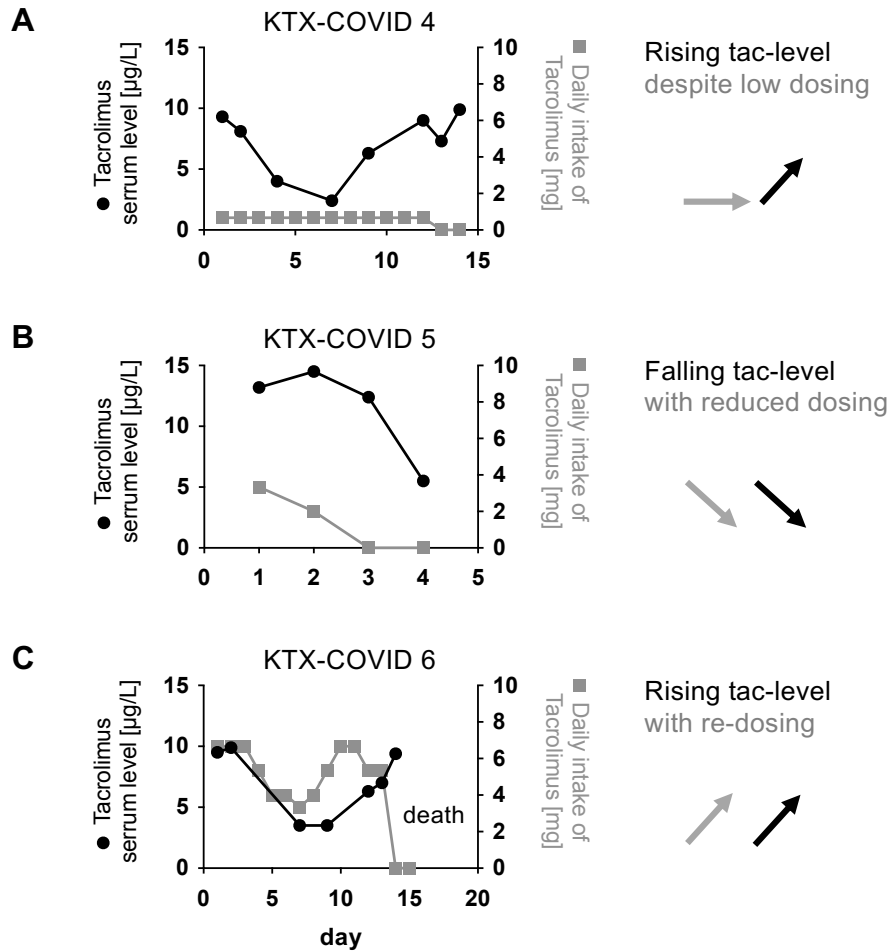

**SUPPLEMENTARY FIGURE 3:**

**Representative interactions of tacrolimus level and dosing (KTX-COVID #4, #5, and #6)**

Left: diagrams of tacrolimus serum trough levels [ $\mu\text{g/L}$ ] and of corresponding dosing in mg/d upon admission. Right: schematics summarizing the respective trends of both parameters.

- (A)** Difficulty in reaching low serum level targets due to spontaneous rise despite low dosing.
- (B)** Successful response of serum levels to reduced dosing.
- (C)** Successful initial response of serum levels to low dosing followed by re-increase of serum levels due to unintentionally high re-dosing (owing to a misunderstanding about new lower serum target levels during COVID-19).
